# Supplementary material for: A novel mixed-valence complex containing CoII2CoIII2molecular squares with 4,5-imidazoledicarboxylate bridges
Source: Royal Society of Chemistry journal article supplement (doi:10.1039/b315357f), 2004-01-01
Supplement: b315357f.doc [file b315357f.doc]

*Electronic Supplementary Information*

A Novel Mixed-Valence Complex Containing CoII2CoIII2 Molecular Squares with 4,5-Imidazoledicarboxylate Bridges

Chuan-Feng Wang, En-Qing Gao, Zheng He and Chun-Hua Yan

**Scheme S1.** Imidazoledicarboxylic acid (H3IDC)


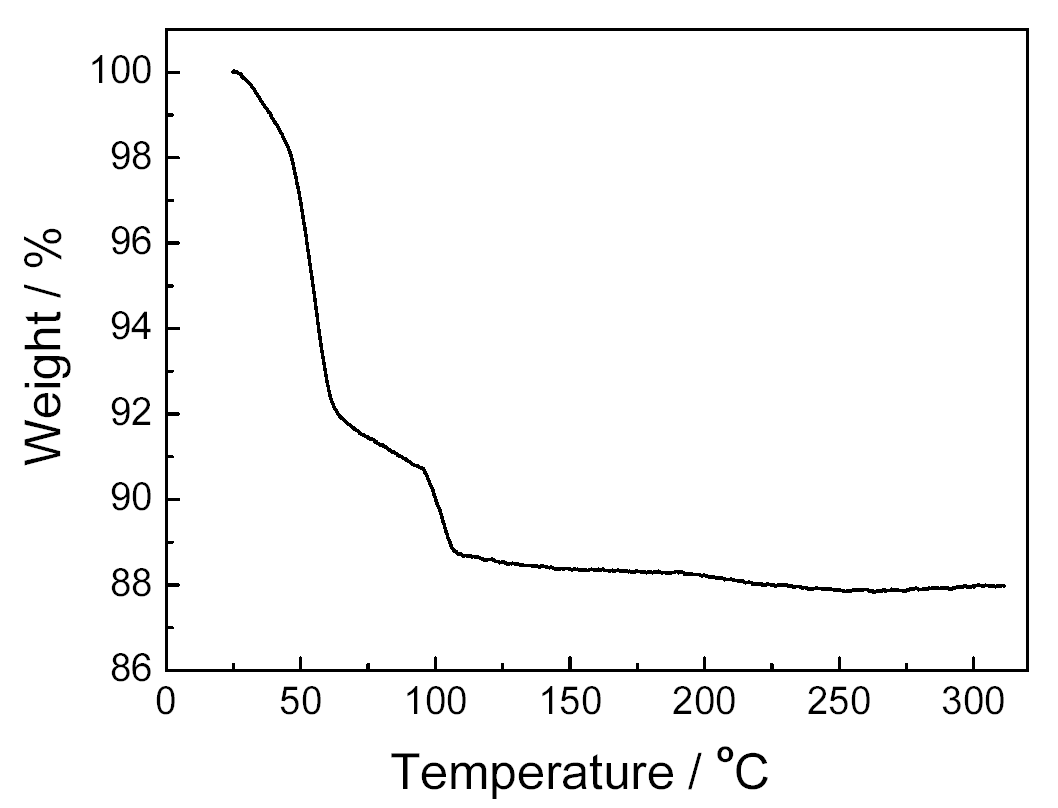


**Figure S1.** TGA diagram of **1**.

***
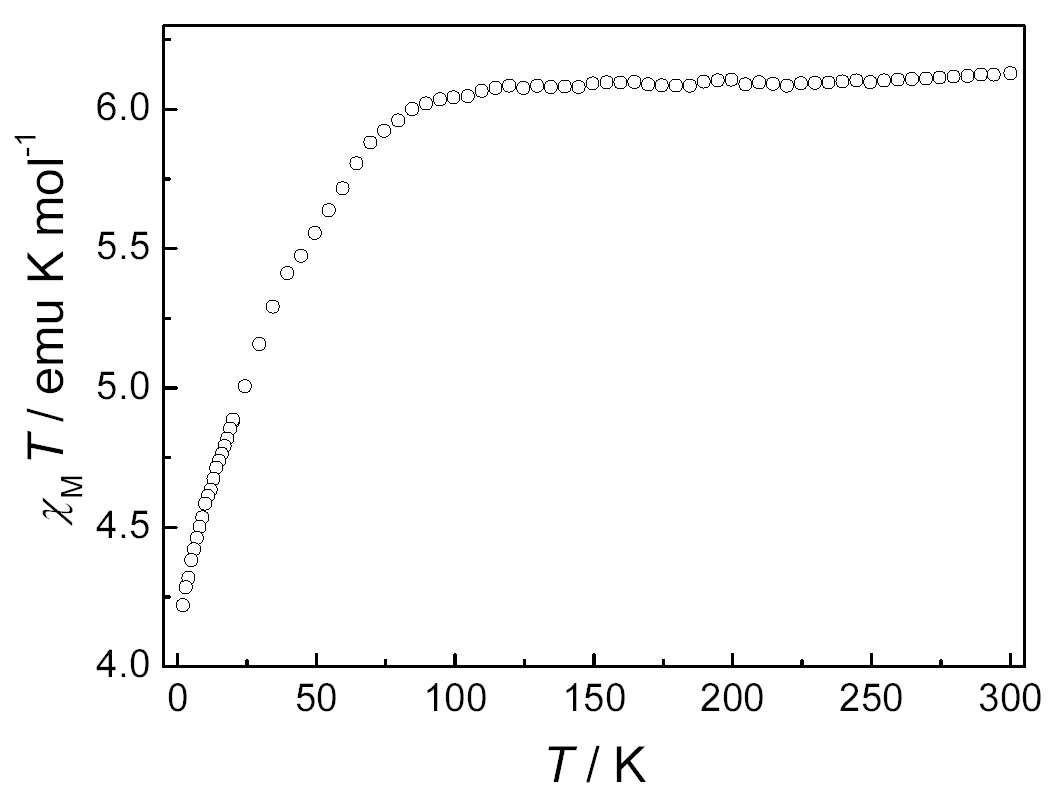
***

**Figure S2.** Temperature dependence of the T product per square( is the magnetic susceptibility)
